# Supplementary material
Source: publisher figshare collection journal article supplement (https://plos.figshare.com/articles/dataset/_/141297)
Supplement: Supplementary file 1 [file 1 › Text_S4.pdf]

**หลักจริยธรรมการวิจัยในอาสาสมัครที่เป็นมนุษย์**  
**ของวิทยาลัยสาธารณสุขบรู๊ค มหาวิทยาลัยจอห์นส์ ฮอปกินส์ (JHSPH)**  
**แนวทางการฝึกอบรมภาคสนาม**

แนวปฏิบัตินี้มีจุดประสงค์เพื่อใช้เป็นเครื่องมือสำหรับการฝึกอบรมบุคลากรที่จะ “มีส่วนเกี่ยวข้อง” ในบางส่วนของ การปฏิสัมพันธ์หรือการแทรกแซงกับอาสาสมัครวิจัยที่เป็นมนุษย์ มุ่งหมายให้ผู้วิจัยหลัก (PI) ของมหาวิทยาลัยจอห์นส์ ฮอปกินส์ ผู้มีหน้าที่รับผิดชอบในการฝึกอบรมแก่เจ้าหน้าที่ในทีมวิจัย ผู้ซึ่งจะ (1) ขอความยินยอมโดยได้รับการบอกกล่าวจากอาสาสมัครวิจัย หรือ (2) เก็บข้อมูลของอาสาสมัคร โดยจากทั้งการสัมภาษณ์เป็นรายบุคคลหรือแบบกลุ่มเฉพาะ จากการทดสอบ จากการวัดทางกายภาพ หรือกระบวนการอื่นๆ ที่เป็นการติดต่อโดยตรง ซึ่งต่อจากนี้จะเรียกว่า “ผู้เก็บข้อมูล” การเขียนเนื้อหาและระดับของภาษาที่ใช้ในแนวปฏิบัตินี้ เป็นไปเพื่อช่วยผู้วิจัยให้สามารถนำเอาหลักการวิจัยเบื้องต้นและพฤติกรรมที่สอดคล้องกับหลักการวิจัยนี้ส่งต่อไปให้ผู้เก็บข้อมูล เราสนับสนุนให้ผู้ใช้แปลเอกสารเป็นภาษาท้องถิ่นต่างๆ และจะยินดีอย่างยิ่งหากได้ส่งฉบับแปลมายังสำนักงานของเรา ([irboffice@jhsphe.edu](mailto:irboffice@jhsphe.edu)) เพื่อเผยแพร่ต่อไป

**รายการเนื้อหา**

1. จรรยาบรรณในการปฏิบัติต่ออาสาสมัครที่เป็นมนุษย์
  - ก. บทบาทของผู้เก็บข้อมูล
  - ข. ความสำคัญของการเคารพ
  - ค. การเข้าร่วมโดยสมัครใจ
  - ง. การขอคำยินยอมโดยได้รับการบอกกล่าว
  - จ. ประชากรที่อ่อนด้อย
  - ฉ. ความเป็นส่วนตัว
  - ช. การปกป้องคุ้มครองข้อมูลส่วนตัว
  - ซ. การตอบคำถามของอาสาสมัคร
2. ความน่าเชื่อถือของข้อมูล
  - ก. เคารพต่อวิธีการของการศึกษา
  - ข. การเก็บข้อมูล การบันทึกและการเก็บรักษาข้อมูลการศึกษา
  - ค. การเบี่ยงเบนออกจากวิธีปฏิบัติในการศึกษา

## 1. จรรยาบรรณในการปฏิบัติต่ออาสาสมัครที่เป็นมนุษย์

### ก. บทบาทของผู้เก็บข้อมูล

บุคคลผู้เก็บข้อมูลเพื่อประโยชน์ของทีมวิจัยเป็นตัวแทนของการวิจัย เพราะผู้เก็บข้อมูลบางครั้งเป็นบุคคลเพียงคนเดียวของทีมวิจัยผู้ที่อาสาสมัครจะสามารถมีปฏิสัมพันธ์ด้วย บุคคลที่พูดคุยด้วยจะมีความรู้สึกที่ดีหรือไม่ดีต่อการศึกษา ขึ้นอยู่กับว่าผู้เก็บข้อมูลจะแนะนำตนเองอย่างไร

ผู้เก็บข้อมูลมีหน้าที่ทำให้เกิดความมั่นใจว่าข้อมูลที่ถูกเก็บมาเพื่อการศึกษา มาจากผู้ที่เกี่ยวข้องที่เขาตกลงจะทำ นอกจากนี้ผู้เก็บข้อมูลต้องมั่นใจว่าข้อมูลที่ได้เก็บและบันทึกมามีความถูกต้องและมีการป้องกันจากการสูญหาย มิฉะนั้นแล้ววัตถุประสงค์ของการวิจัยจะไม่บรรลุผลสำเร็จ และเพื่อให้บรรลุผลสำเร็จ ผู้เก็บข้อมูลจะต้องปฏิบัติตามแผนการวิจัย คู่มือปฏิบัติการวิจัย และกระบวนการอื่นๆที่เกี่ยวข้องกับการติดต่ออาสาสมัคร อย่างรอบคอบ

### ข. ความสำคัญของการเคารพ

เจ้าหน้าที่แต่ละคนที่เป็นส่วนหนึ่งของทีมวิจัยต้องเคารพต่อ:

- เป้าหมายของโครงการวิจัย
- หัวหน้าโครงการวิจัย
- บุคคลผู้เป็นอาสาสมัครวิจัย
- ชุมชนที่เข้าร่วม และ
- ข้อมูลที่ถูกเก็บ เพื่อช่วยให้บรรลุวัตถุประสงค์ของโครงการ

โครงการทางวิทยาศาสตร์มีศักยภาพในการให้ประโยชน์แก่ชุมชนที่จะได้ทำการศึกษา หากทีมวิจัยสามารถทำให้สำเร็จได้ในทุกส่วนของการวิจัย

เจ้าหน้าที่ทีมวิจัยแต่ละคนต้องปฏิบัติต่อสมาชิกทั้งหมดในชุมชนที่เข้าร่วมด้วยความเคารพ รวมถึงการเคารพต่อวัฒนธรรม เพศภาวะ (Gender) อายุ สถานภาพทางสังคม ศาสนา และลักษณะพิเศษอื่นๆของชุมชนที่เข้าร่วม ที่ทำให้ผู้คนมีความแตกต่างจากที่อื่นๆ รวมถึงสิทธิในการถามคำถาม อาสาสมัครไม่จำเป็นต้องช่วยทีมวิจัยโดยการเข้าร่วมการวิจัย และอาจไม่เข้าร่วมหากทีมวิจัยไม่ให้

ความเคารพต่อสิทธิของอาสาสมัครในการตัดสินใจว่าจะ “เข้าร่วม” หรือ “ไม่เข้าร่วม” หรือให้ได้รับข้อมูลที่ถูกต้องและเป็นจริงจากสมาชิกในทีมทั้งหมด

ผู้เก็บข้อมูลแสดงให้เห็นอาสาสมัครแต่ละคนเห็นถึงความสำคัญของจุดประสงค์ของการวิจัยโดยการเก็บข้อมูลด้วยวิธีที่น่าเชื่อถือและเป็นมืออาชีพ ตัวอย่างเช่น:

- สุกภาพต่ออาสาสมัครเสมอ แม้ว่าอาสาสมัครจะตกลงเข้าร่วมในการวิจัยหรือไม่ก็ตาม
- ถ้าผู้เก็บข้อมูลถามคำถาม ให้ถามด้วยน้ำเสียงที่ชัดเจน
- บันทึกข้อมูลให้เรียบร้อยในแผ่นบันทึกข้อมูล
- ถ้าอาสาสมัครมีคำถามให้ตอบคำถามที่ถูกต้อง หากไม่ทราบคำตอบ และเป็นไปได้ที่จะได้รับคำตอบนั้นจากหัวหน้าของท่าน ให้บอกอาสาสมัครว่าท่านจะหาคำตอบมาและจะแจ้งให้ทราบ
- ขอบคุณาอาสาสมัครเมื่อเสร็จสิ้นกระบวนการศึกษา

#### ค. การเข้าร่วมโดยสมัครใจ

ไม่มีผู้ใดถูกกำหนดให้เข้าร่วมในโครงการวิจัย หากการวิจัยประกอบด้วยกระบวนการขอคำยินยอม โดยได้รับการบอกกล่าว อาสาสมัครแต่ละคนที่เจ้าหน้าที่ทีมวิจัยเข้าหา มีสิทธิในการปฏิเสธที่จะรับฟังเกี่ยวกับการวิจัย และมีสิทธิปฏิเสธการเข้าร่วมการวิจัย และถึงแม้เข้าร่วมการวิจัยแล้วก็อาจปฏิเสธในการตอบคำถามที่เฉพาะเจาะจงในแบบสำรวจหรือในแบบสอบถาม ปฏิเสธการให้ตัวอย่างสิ่งส่งตรวจ หรือปฏิเสธที่จะทำการทดสอบ และอาจตัดสินใจถอนตัวออกจากการศึกษาได้ตลอดเวลา

เจ้าหน้าที่ทีมวิจัยที่ได้รับคำยินยอมจากอาสาสมัคร มีหน้าที่ทำให้มั่นใจว่าอาสาสมัครเข้าใจว่าการวิจัยนั้นเกี่ยวกับอะไร และตกลงเข้าร่วมการวิจัยจริงๆ และไม่ใช่เข้าร่วมเพราะว่าอาสาสมัครกลัวหรือรู้สึกว่าคุณบังคับให้เข้าร่วม

#### ง. การขอคำยินยอมโดยได้รับการบอกกล่าว

การให้ข้อมูลที่ถูกต้อง เป็นจริงแก่บุคคลที่ถูกทาบทามให้เข้าร่วมโครงการซึ่งเป็นส่วนที่มีความสำคัญของการวิจัยในอาสาสมัครที่เป็นมนุษย์ การขอคำยินยอมโดยได้รับการบอกกล่าวเป็นกระบวนการต่อเนื่องที่เริ่มต้นโดยเจ้าหน้าที่ทีมวิจัยอธิบายการศึกษาแก่อาสาสมัคร การขอคำ

ยินยอมโดยได้รับการบอกกล่าวไม่เสร็จสิ้นเพียงแค่อาสาสมัครลงชื่อในแบบฟอร์มการขอคำยินยอม และตกลงเข้าร่วมการวิจัยเท่านั้น แต่จะดำเนินต่อไปตลอดการศึกษา ตัวอย่างเช่น อาจเกิดขึ้นได้ในแต่ละครั้งที่ผู้เก็บข้อมูลและอาสาสมัครมีปฏิสัมพันธ์กัน จะถือว่า “ความยินยอม” นั้นยังไม่ใช้ความยินยอมที่แท้จริง หากอาสาสมัครไม่ได้มีความเข้าใจอย่างเพียงพอในสิ่งที่กำลังถูกขอ ทีมวิจัยกำหนดล่วงหน้าว่าเวลาเท่าไรคือ “เพียงพอ” และจะให้ข้อมูลนั้นอย่างไร งานของผู้ดำเนินการขอคำยินยอมคือ ชี้แจงข้อมูลเกี่ยวกับการศึกษาแก่อาสาสมัครในภาษาที่ทำให้อาสาสมัครเข้าใจ และแสดงถึงจุดประสงค์ของการศึกษา กระบวนการ ความเสี่ยงที่อาจมี และประโยชน์ของการศึกษา ภาษาและรูปแบบของการสื่อสารต้องเป็นไปเพื่อให้อาสาสมัครเข้าใจได้ ต้องใช้เวลาอาสาสมัครอย่างเพียงพอเพื่อถามคำถามและตัดสินใจว่าจะเข้าร่วมการวิจัยหรือไม่

บางครั้งเป็นสิ่งสำคัญที่จะต้องเน้นย้ำอาสาสมัครทุกครั้งตามความเหมาะสมเพื่อให้มั่นใจว่าอาสาสมัครเข้าใจอย่างต่อเนื่องเกี่ยวกับการวิจัยหรืออะไรที่เกี่ยวข้อง เจ้าหน้าที่ทีมวิจัยที่ได้รับคำยินยอมอาจถามคำถามอาสาสมัครเพื่อทดสอบว่าอาสาสมัครทราบและเข้าใจถูกต้องหรือไม่ เจ้าหน้าที่ทีมวิจัยต้องสังเกตภาษากายของอาสาสมัครด้วย ซึ่งอาสาสมัครอาจมีความไม่สบายใจหรือมีความสับสนแต่ไม่พูดออกมา หากสังเกตได้ว่ามีปฏิกิริยาเหล่านี้ เจ้าหน้าที่ทีมวิจัยควรแจ้งผู้ดูแลของตนเพื่อขอคำแนะนำต่อไป

#### จ. ประชากรที่อ่อนด้อย

บางคนต้องการการใส่ใจและดูแลเป็นพิเศษในการทาบทามให้เข้าร่วมโครงการวิจัย เพราะบุคคลเหล่านั้นอยู่ในสภาพที่ยากต่อการเข้าใจในสิ่งที่กำลังบอกแก่ตน และยากต่อการให้คำยินยอมโดยได้รับการบอกกล่าว ตัวอย่างเช่น เด็กต้องการ “การคุ้มครอง” เป็นพิเศษและเป็นสิ่งสำคัญที่พ่อแม่ของเด็กจะตัดสินใจบางอย่างแทนเด็ก หรือผู้ใหญ่ที่มีปัญหาทางด้านสมองอาจไม่เข้าใจในสิ่งที่ท่านขอให้เขาทำ โครงร่างการวิจัยและคู่มือวิธีปฏิบัติที่พัฒนาขึ้นมาโดยผู้วิจัยจะบอกถึงวิธีการที่จะเข้าถึงพวกเขาเหล่านี้ และหากพวกเขาได้เข้าร่วมในโครงการวิจัย เจ้าหน้าที่ทีมวิจัยต้องระมัดระวังอย่างมากโดยปฏิบัติตามระเบียบต่างๆเมื่อรับอาสาสมัครที่อยู่ในกลุ่มประชากรที่อ่อนด้อย เพราะตลอดเวลาโดยส่วนมากที่พวกเขาจะไม่สามารถตัดสินใจทำอะไรได้ด้วยตัวเอง

#### ฉ. ความเป็นส่วนตัว

บุคคลมีสิทธิในความเป็นส่วนตัว ซึ่งเจ้าหน้าที่ทีมวิจัยต้องเข้าใจและให้ความเคารพ แม้ว่าโดยสถานการณ์แล้วจะไม่ส่งเสริมหรือรับรองให้เป็นไปตามหลักการโดยทั่วไปของ “ความเป็น

ส่วนตัว” ได้ เป็นสิ่งสำคัญที่สิทธิความเป็นส่วนตัวต้องได้รับการปกป้องในทุกๆขอบเขตที่เป็นไปได้ ตัวอย่างเช่น อาจมีธรรมเนียมที่ว่าจะไม่มีการเข้าบ้านคนอื่นโดยไม่ได้รับการเชิญ ในอีกด้านหนึ่งการเข้าพบของผู้เก็บข้อมูลที่บ้านอาจเป็นการดึงดูดผู้พบเห็นที่มีความอยากรู้อยากเห็น ซึ่งก็สมควรส่งเสริมในท่าทีของผู้คนเหล่านั้น นั่นเพราะเพื่อปกป้องทั้งอาสาสมัครและเพื่ออำนวยความสะดวกให้ผู้เก็บข้อมูลและอาสาสมัครมีสมาธิกับขั้นตอนที่สำคัญของการเก็บข้อมูล การร้องขอความเป็นส่วนตัวทำให้อาสาสมัครเชื่อมั่นได้อีกว่าผู้เก็บข้อมูลได้ให้ความเคารพว่าบ้านคือสถานที่อยู่อาศัยของครอบครัว ไม่ใช่พื้นที่สาธารณะ

เจ้าหน้าที่ทีมวิจัยยังต้องให้ความเคารพกับความเป็นส่วนตัวของอาสาสมัคร โดยไม่ทำอะไรที่จะทำให้เขาารู้สึกอับอายหรืออึดอัดโดยไม่จำเป็น การสัมภาษณ์เกี่ยวกับข้อมูลที่มีความอ่อนไหว จะต้องทำในสถานที่ที่ผู้อื่นไม่สามารถได้ยินคำถามหรือคำตอบ การตรวจร่างกายไม่ควรทำในสถานที่ที่บุคคลอื่นสามารถมองเห็นได้ และยังมีบางอย่างที่พิจารณาได้ว่าเป็นเรื่องส่วนตัว เช่น กิจกรรมทางเพศ สุขภาพส่วนตัว หรือความคิดเห็นต่างๆที่บุคคลอาจไม่ต้องการพูดในที่สาธารณะ

#### ข. การปกป้องคุ้มครองข้อมูลส่วนตัว

เมื่ออาสาสมัครเปิดเผยข้อมูลส่วนตัวของตนแก่ผู้เก็บข้อมูล นั้นหมายความว่าอาสาสมัครกำลังเสี่ยงว่าข้อมูลของตนจะถูก “เปิดเผย” ทำให้เสี่ยงต่อการสูญเสียการเป็นความลับ ความเสี่ยงนั้นคือ หากบุคคลใดนอกเหนือจากการวิจัยรับรู้ถึงข้อมูลส่วนตัวนั้น ผลเสียย่อมเกิดขึ้นกับอาสาสมัคร เช่น ความอับอาย การถูกเลิกล้าง ปัญหากับเจ้าหน้าที่ตำรวจ หรือผลกระทบทางสังคม ทีมวิจัยมีความรับผิดชอบในการปกป้องคุ้มครองอาสาสมัครจากความเสียหายเหล่านี้

หลังจากที่อาสาสมัครได้ให้ข้อมูลแล้ว ข้อมูลส่วนตัวต้องเก็บไว้อย่างปลอดภัย บุคคลที่ไม่มีอำนาจเหมาะสมไม่สามารถดู หรือเข้าถึงข้อมูลนั้นได้ หากข้อมูลนั้นบันทึกไว้ในกระดาษ กระดาษเหล่านั้นต้องได้รับการปกป้องจนกว่าจะได้จัดเก็บไว้ในตู้ที่มีกุญแจล็อก เจ้าหน้าที่โครงการที่ได้รับมอบหมายจากผู้วิจัยในการจัดการข้อมูลเท่านั้นที่จะสามารถเห็นและดำเนินการกับข้อมูลนั้นได้ แต่หากข้อมูลบันทึกไว้ในระบบอิเล็กทรอนิกส์ จะต้องมีการป้องกันทุกวิถีทางเท่าที่จำเป็น เพื่อให้มั่นใจว่าจะไม่มีผู้ใดสามารถเข้าถึงได้โดยไม่ได้รับอนุญาต

บางครั้งมีการใช้ตัวเลขเลือกสุ่มเพื่อระบุที่มาของข้อมูล ซึ่งจะไม่มีการทราบข้อมูลนั้นมาจากอาสาสมัครคนใด เอกสารใดๆที่จะเชื่อมโยงกับตัวเลขและชื่อของบุคคลต้องได้รับการเก็บไว้ในตู้ที่

มีถูกแยกล็อกและอยู่ในสถานที่ที่ปลอดภัย โดยการปฏิบัติตามโครงการวิจัยและคู่มือวิธีปฏิบัติ เพื่อให้มั่นใจว่าข้อมูลในการวิจัยนั้นได้รับการปกป้องอย่างแท้จริงตามที่กำหนดไว้ในคู่มือ

#### ซ. การตอบคำถามของอาสาสมัคร

หลายๆคน รวมถึง บุคคลที่คาดหวังว่าจะเข้าร่วม อาสาสมัครปัจจุบัน และผู้คนที่อยากรู้ อยากเห็น แต่ไม่เกี่ยวข้องกับการศึกษาที่ผู้เก็บข้อมูลพบเจอจะมีคำถามเกี่ยวกับการศึกษา บางคนไม่เข้าใจว่า “วิจัย” คืออะไร หรือไม่ทราบอะไรเลยเกี่ยวกับผู้วิจัยที่เป็นหัวหน้าโครงการ พวกเขาอาจจะมีคำถามมากมาย บางคำถามอาจไม่เกี่ยวข้องกับการเรียน การศึกษาเลย

ผู้วิจัยจะอบรมผู้เก็บข้อมูลเพื่อเตรียมรับมือกับข้อกังวลหลายๆอย่างที่คาดการณ์ได้ และมีแนวโน้มว่าจะถูกถามจากผู้คนที่ทำงาน “ภาคสนาม” ที่ในกิจวัตรทุกๆวัน ผู้เก็บข้อมูลซึ่งเป็นตัวแทนของการวิจัย เมื่อต้องพูดคุยกับผู้ที่จะมาเป็นอาสาสมัคร และชุมชนโดยรวม เป็นความจำเป็นที่ผู้เก็บข้อมูลต้องแสดงความเคารพอย่างเหมาะสมกับทุกคน และทำทุกอย่างเพื่อพูดคุยเกี่ยวกับความกังวลของพวกเขาให้ได้ดีที่สุด ผู้เก็บข้อมูลควรมีความอดทน และตอบทุกคำถามที่อาสาสมัครมี จนกว่าผู้เก็บข้อมูลทราบคำตอบทุก ผู้เก็บข้อมูลไม่ควรตอบคำถามที่ไม่ทราบอย่างชัดเจน เพราะการให้ข้อมูลที่ผิดจะส่งผลเสียมากกว่าการไม่ได้ให้ข้อมูล ซึ่งอย่างน้อยก็เป็นเพียงชั่วระยะเวลาหนึ่ง ในสถานการณ์เช่นนี้ บอกกับบุคคลนั้นว่าท่านไม่มั่นใจในคำตอบ ซึ่งท่านจะได้ถามผู้ดูแลและจะนำคำตอบมาบอกแก่อาสาสมัคร เป็นเรื่องที่สำคัญมากเพราะจะแสดงถึงการเคารพต่ออาสาสมัคร และทำให้มั่นใจได้ว่า ข้อมูลที่ส่งต่อไปให้กับอาสาสมัครนั้นถูกต้อง เมื่อท่านคิดว่าอาสาสมัครคงไม่มีคำถามใดๆแล้ว ท่านอาจจะถามว่า “คุณมีคำถามอะไรอื่นอีกหรือไม่?” เพื่อให้มั่นใจว่าทุกคำถามได้รับการพูดคุยแล้ว หากว่าไม่มีคำถามใดๆอีก ท่านก็สามารถดำเนินการต่อไปได้

## 2. ความน่าเชื่อถือของข้อมูล

#### ก. การพอวิธีของการศึกษา

ข้อมูลคือ “ผล” ของการวิจัย สิ่งนี้มีความสำคัญอย่างมากที่ข้อมูลซึ่งได้มา บันทึกและเก็บรักษาไว้ โดยผู้เก็บข้อมูลนั้นจะต้องมีความถูกต้อง นักวิทยาศาสตร์จะใช้ข้อมูลเหล่านี้เพื่อตอบคำถามการวิจัยที่ระบุไว้ในโครงการวิจัย หากข้อมูลนั้นผิด คำตอบที่นักวิทยาศาสตร์นั้นสรุปขึ้นมาก็ย่อมผิดไปด้วย ชีวิตของผู้คนอาจได้รับผลกระทบจากผลของการศึกษา อาจตกอยู่ในความเสี่ยง เพราะว่า

คำตอบนั้นผิดและการกระทำที่ตามมาที่จะผิดด้วย ดังนั้นจึงมีความสำคัญอย่างยิ่งที่ข้อมูลทั้งหมดจะต้องมีการเก็บอย่างเหมาะสม บันทึกอย่างเหมาะสม และเก็บรักษาไว้อย่างเหมาะสมอยู่ตลอดเวลา หากเกิดข้อผิดพลาดที่ท่านทำไว้กับสิ่งเหล่านี้ จำเป็นอย่างยิ่งที่ท่านจะต้องบอกกับผู้ดูแลโดยทันที เพื่อว่าผู้วิจัยหรือหัวหน้าทีมวิจัยจะได้รับทราบ และอาจจะแก้ไขปัญหา หรือไม่ได้ทราบว่าข้อมูลบางชิ้นไม่สามารถนำมาใช้ได้

#### ข. การเก็บข้อมูล การบันทึกและการเก็บรักษาข้อมูลการวิจัย

โครงร่างการวิจัยได้บอกไว้อย่างชัดเจนถึงวัตถุประสงค์ของการศึกษา และวิธีการที่ทีมวิจัยจะบรรลุถึงวัตถุประสงค์นั้น รายละเอียดของการเก็บข้อมูล และบันทึกข้อมูลการวิจัย จะรวมไว้ในโครงร่างการวิจัยนี้ และโดยทั่วไปคู่มือวิธีปฏิบัติจะมีข้อมูลที่เป็นรายละเอียดในวิธีดำเนินการให้สำเร็จลุล่วง ผู้เก็บข้อมูลต้องเข้าใจอย่างถ่องแท้ว่าควรเก็บข้อมูลอย่างไร และควรเก็บบันทึกอย่างไร หัวหน้าทีมวิจัยควรต้องอบรมกระบวนการเหล่านี้ให้กับผู้เก็บข้อมูล หากผู้เก็บข้อมูลมีปัญหาใดๆ ก็ไม่ควรเกรงใจที่จะถาม ในความเป็นจริง หากผู้เก็บข้อมูลไม่ถามคำถามขณะที่พวกเขาไม่แน่ใจว่าควรจะทำสิ่งนั้นสิ่งนี้อย่างไร พวกเขาจะไม่สามารถรับประกันได้ว่าข้อมูลที่ได้นั้นจะถูกต้อง

หลังจากที่การอบรมสิ้นสุดลง ผู้เก็บข้อมูลจึงสามารถเริ่มงานได้ การเก็บข้อมูลที่ดีหมายถึงการปฏิบัติตามข้อแนะนำและการกรอกข้อมูลที่สมบูรณ์ ถูกต้องในแผ่นบันทึกข้อมูล การบันทึกข้อมูลอย่างเหมาะสม รวมถึงการทำให้มั่นใจว่าคำตอบได้กรอกด้วยลายมือที่อ่านได้และไม่กรงรัง ผู้เก็บข้อมูลต้องบันทึกข้อมูลด้วยความซื่อสัตย์และมีความถูกต้อง ข้อมูลอื่นๆเพิ่มเติมที่ไม่ได้ระบุไว้ในแผ่นบันทึกข้อมูลก็ไม่ควรจะถูกบันทึกลงไป อย่างเช่น หากไม่มีช่องให้กรอก “ชื่อ” และ “ที่อยู่” ก็ไม่ควรบันทึกข้อมูลเหล่านี้ลงในแผ่นบันทึกข้อมูล ไม่ควรมีการ “สร้าง” ข้อมูลใดๆขึ้นมาเองและบันทึกลงในแผ่นบันทึกข้อมูล

การเก็บรักษาข้อมูลที่เหมาะสมหมายถึงว่าได้มีการป้องกันด้านความปลอดภัยทั้งหลายในขณะที่เคลื่อนย้าย ขนส่งข้อมูลสู่สถานที่เก็บที่มีพื้นที่กว้างขวาง ผู้เก็บข้อมูลไม่ควรวางแผ่นบันทึกข้อมูลไว้ในที่ที่อาจเกิดการสูญหาย ถูกขโมย หรืออ่านโดยบุคคลภายนอก แผ่นบันทึกข้อมูลควรมอบให้กับบุคคลที่มีหน้าที่ในการเก็บรักษา และบุคคลนั้นย่อมต้องปฏิบัติตามคำแนะนำทั้งหมดเกี่ยวกับการปกป้องความลับของข้อมูล หากข้อมูลถูกเก็บในรูปแบบอิเล็กทรอนิกส์ก็ต้องปฏิบัติตามหลักการและกฎของความซื่อสัตย์ การปกป้อง การดูแลที่เหมือนกัน

#### ค. การเบี่ยงเบนออกจากวิธีปฏิบัติในการวิจัย

บางครั้งผู้เก็บข้อมูลไม่สามารถปฏิบัติตามวิธีปฏิบัติในการวิจัยอย่างเลียงไม่ได้ และบางครั้งผู้เก็บข้อมูลก็ทำผิดพลาด สิ่งสำคัญคือต้องแจ้งให้หัวหน้าทีมวิจัยทราบเกี่ยวกับปัญหานั้น เพราะว่าหัวหน้าทีมวิจัยต้องรับผิดชอบในการรายงานปัญหาเหล่านั้นแก่คณะกรรมการพิจารณาการวิจัยประจำสถาบัน(IRB) ไม่ใช่เรื่องน่าอายในการรายงานปัญหา เพราะสิ่งเหล่านี้เกิดขึ้นได้ตลอดเวลา เป็นสิ่งจำเป็นที่ต้องรายงานปัญหาเหล่านั้น เพราะมันหมายความว่าข้อมูลนั้นใช้การไม่ได้ หรืออาจมีผลกระทบต่อปัญหาการวิจัย และยังหมายถึงว่าผู้ดูแลการวิจัยจะไม่สามารถเสร็จสิ้นการรายงานแก่ IRB ได้ด้วย

ผู้เก็บข้อมูลที่ดีจะแจ้งประเด็นเหล่านี้แก่ผู้ดูแลของพวกเขา และให้ผู้ดูแลตัดสินใจว่าจะมีวิธีดำเนินการอย่างไรต่อไป
